1 **The spectral underpinnings of pathogen spread on animal networks**

2 **Authors:** Nicholas M. Fountain-Jones<sup>1\*</sup>, Mathew Silk<sup>2,3</sup>, Raima Appaw<sup>1</sup>, Rodrigo Hamede<sup>1</sup>,  
3 Julie Rushmore<sup>4</sup>, Kimberly VanderWaal<sup>5</sup>, Meggan Craft<sup>6</sup>, Scott Carver<sup>1</sup> & Michael  
4 Charleston<sup>1</sup>

5 **Affiliations:**

6 <sup>1</sup>School of Natural Sciences, University of Tasmania, Hobart Australia 7001.

7 <sup>2</sup>CEFE, University of Montpellier, CNRS, EPHE, IRD, University of Paul Valéry  
8 Montpellier 3, Montpellier, France

9 <sup>3</sup>Centre for Ecology and Conservation, University of Exeter, Penryn Campus, Penryn, UK

10 <sup>4</sup>Odum School of Ecology, University of Georgia, Athens, GA USA.

11 <sup>5</sup> Department of Veterinary Population Medicine, University of Minnesota, St Paul, MN,  
12 USA

13 <sup>6</sup> Department of Ecology, Evolution, and Behavior, University of Minnesota, St Paul, MN,  
14 USA

15

16 \*Nick.FountainJones@utas.edu.au

17

18 **Abstract**

19

20 Predicting what factors promote or protect populations from infectious disease is a

21 fundamental epidemiological challenge. Social networks, where nodes represent hosts and

22 edges represent direct or indirect contacts between them, are key to quantifying these aspects

23 of infectious disease dynamics. However, understanding the complex relationships between

24 network structure and epidemic parameters in predicting spread has been out of reach. Here

25 we draw on advances in spectral graph theory and interpretable machine learning, to build

26 predictive models of pathogen spread on a large collection of empirical networks from across

27 the animal kingdom. Using a small set of network spectral properties, we were able to predict

28 pathogen spread with remarkable accuracy for a wide range of transmissibility and recovery

29 rates. We validate our findings using well studied host-pathogen systems and provide a

30 flexible framework for animal health practitioners to assess the vulnerability of a particular  
31 network to pathogen spread.

32

### 33 **Introduction**

34

35 Capturing patterns of direct or indirect contacts between hosts is crucial to model pathogen  
36 spread in populations (Newman 2002; Craft 2015; Sah *et al.* 2018, 2021). Increasingly,  
37 contact network approaches, where hosts are nodes and edges reflect interactions between  
38 hosts, play a central role in epidemiology and disease ecology (e.g., Meyers *et al.* 2005;  
39 Bansal *et al.* 2007; Eames *et al.* 2015; White *et al.* 2017). Incorporating networks allows  
40 models to capture the heterogeneity of contacts between individuals that can provide more  
41 nuanced and reliable estimates of pathogen spread, including in wildlife populations (e.g.,  
42 Meyers *et al.* 2006; Bansal *et al.* 2010; Craft *et al.* 2011). Formulating general rules for how  
43 easy-to-calculate network structure properties may promote or restrict pathogen spread can  
44 reveal important insights into how host behaviour can mediate epidemic outcomes (Sah *et al.*  
45 2017), and provide practitioners with a proxy for how vulnerable a population is to disease  
46 without extensive simulations (Silk *et al.* 2017; Sah *et al.* 2018). Further, network structural  
47 properties can be incorporated into traditional susceptible–infected–recovered (SIR) models  
48 to account for contact heterogeneity when predicting pathogen dynamics across populations  
49 (e.g., Meyers *et al.* 2005; Bansal *et al.* 2007).

50

51 However, it remains unclear whether one structural characteristic or a combination of  
52 characteristics can reliably predict pathogen dynamics across systems (Ames *et al.* 2011; Sah  
53 *et al.* 2018). For example, species that are more social tend to have more clustered or  
54 “modular” networks, and this modularity has been found to increase (Lentz *et al.* 2012),  
55 reduce (Salathé & Jones 2010) or have little effect (Sah *et al.* 2018) on outbreak size across

56 different biological systems. The average number of contacts between hosts can be identical  
57 across networks and yet still result in substantially different outbreak patterns (Ames *et al.*  
58 2011). Even the apparent size of the network, often constrained by limitations of sampling,  
59 can impact estimates of pathogen spread, particularly in wildlife populations (McCabe &  
60 Nunn 2018). As network characteristics, such as network size and modularity, are often  
61 correlated (Newman 2006; Silk *et al.* 2017) and can have complex impacts on spread (Sah *et*  
62 *al.* 2017; McCabe & Nunn 2018; Porter 2020), determining network characteristics that  
63 promote large outbreaks, for example, remains a fundamental question in infectious disease  
64 biology (Sah *et al.* 2018).

65

66 Searching for general relationships between network structure and pathogen spread in animal  
67 populations is further challenged, as the relationship is also affected by pathogen traits, such  
68 as infectiousness and recovery rate. For example, modularity appears to make no difference  
69 to disease outcomes for highly infectious pathogens (Sah *et al.* 2017). Diseases with long  
70 recovery rates can increase outbreak size across networks as well (Shu *et al.* 2016). Given  
71 that we rarely have reliable estimates of pathogen traits in wild populations (e.g., for different  
72 probabilities of infection per contact, or recovery rates) anyway, any predictive model of the  
73 relationship between spread and network structure would ideally be generalizable across  
74 pathogens.

75

76 Advances in spectral graph theory offer an additional set of measures based on the **spectrum**  
77 of a network rather than average node or edge level attributes. A graph spectrum is the set of  
78 **eigenvalues** (often denoted with a Greek lambda  $\lambda$ ) of a matrix representation of a network  
79 (see Text Box 1 for further definitions for terminology in bold). Theoretical studies have  
80 shown relationships between particular eigenvalues and connectivity across networks are

81 independent of pathogen propagation models (Prakash *et al.* 2010). For example, networks  
82 with a high **Fiedler value** (the second smallest eigenvalue of the network's **Laplacian**  
83 **matrix**) are “more connected” than those with low values. It has been found that, in  
84 ecological networks for example, if the Fiedler value is sufficiently large, removing edges  
85 will have little effect on overall network connectivity (Kumar *et al.* 2019), but whether this  
86 lack of effect is mirrored by pathogen dynamics is not yet clear. Another quantity of interest  
87 is **spectral radius** – the largest absolute value of the eigenvalues of its **adjacency matrix**.  
88 The link between the spectral radius and epidemiological dynamics is better understood, with  
89 theoretical work showing that this value closely mirrors both epidemic behaviour and  
90 network connectivity (Prakash *et al.* 2010) and has been used to understand vulnerability of  
91 cattle networks to disease (Darbon *et al.* 2018). For example, networks with the same number  
92 of edges and nodes but higher spectral radius ( $\lambda_1$ ) are more vulnerable to outbreaks than  
93 networks with low spectral radius ( $\lambda_1 \rightarrow 1$ ). We hypothesize that spectral measures such as  
94 these have great potential to improve our ability to predict dynamics of pathogen spread on  
95 networks, where previous methods such as modularity have proved inadequate (Sah *et al.*  
96 2017).

97

98 We assess the predictive capability of spectral values compared to other structural attributes  
99 such as **modularity** (Newmans' Q; Newman 2006)) using advances in machine learning to  
100 construct non-linear models of simulated pathogen spread across a large collection of  
101 empirical animal networks including those from the Animal Social Network Repository  
102 (ASNR) (Sah *et al.* 2019). The ASNR is a large repository of empirical contact networks that  
103 provides novel opportunities to test the utility of spectral values in predicting spread across a  
104 wide variety of, mostly animal, taxa across a spectrum of social systems -- from eusocial ants  
105 (Arthropoda: Formicidae) to more solitary species such as the desert tortoise (*Gopherus*

106 *agassizii*). Farmed domestic animals were not included in our analyses. We combined  
107 networks from this resource with other published networks, including badgers (*Meles meles*)  
108 (Weber *et al.* 2013), giraffes (*Giraffa camelopardalis*) (VanderWaal *et al.* 2014) and  
109 chimpanzees (*Pan troglodytes*) (Rushmore *et al.* 2013) to generate a dataset of over 600  
110 unweighted networks from 51 species. We then simulated pathogen spread using a variety of  
111 SIR parameters and harnessed recent advances in multivariate interpretable machine learning  
112 models (*MrIML*; (Fountain-Jones *et al.* 2021)) to construct predictive models across SIR  
113 parameter space. As many species were represented by multiple networks, often over  
114 different populations and or timepoints and constructed in different ways (e.g., some edges  
115 reflected spatial proximity rather than direct contact), we included species and network  
116 construction variables in our models to account for these correlations in addition to exploring  
117 the diversity of network structures across the animal kingdom. Our interpretable machine  
118 learning models identify putative threshold values for the vulnerability of a network to  
119 pathogen spread that can be used by practitioners to understand outbreak risk across systems.

120

121 We test how well our network structure estimates of pathogen spread, trained on SIR  
122 simulation results, generalize to more complex pathogen dynamics in the wild. We utilize  
123 two well studied wildlife-pathogen systems to assess how our predictions compare to  
124 empirical estimates of spread; *Mycobacterium bovis* (the bacterium that causes bovine  
125 tuberculosis (bTB)) in badger populations and devil facial tumour disease (DFTD) in  
126 Tasmanian devil (*Sarcophilus harrisii*) populations (Hamede *et al.* 2009). We demonstrate  
127 that using spectral measures of network structure alone can provide a useful proxy for disease  
128 vulnerability with estimates of prevalence comparable to those empirically derived. Further,  
129 we provide a user-friendly app that utilizes our models to provide practitioners with  
130 predictions, for example, of the prevalence of a pathogen across a variety of spread scenarios

131 using a user-supplied network without the need for lengthy simulation. The url for this

132 “Shiny” app is <https://spreadpredictr.shinyapps.io/spreadpredictr/>.

133

134 **Text Box 1:** Terminology used in this paper.

135 A *graph* (or “*network*”) is a collection of *nodes* and a collection of *edges* connecting the

136 nodes in pairs, e.g., nodes  $x, y$  joined by edge  $(x,y)$ . We define the *size* of the network –

137 usually  $n$ , as the number of nodes (this usage differs from other strict mathematical

138 definitions, but we feel this is more intuitive). Two nodes are said to be *adjacent* if they are

139 connected by an edge, and the number of vertices adjacent to a given vertex  $x$  is called its

140 *degree*,  $\deg(x)$ . Edges may be directed, in which case edge  $(x,y)$  is different from edge  $(y,x)$ ,

141 but in our analyses we treat them as *undirected*, so  $(x,y)=(y,x)$ . Graphs can be represented

142 naturally by matrices whose rows and columns are indexed by the nodes  $(1,2,\dots,n)$ : the

143 obvious one is the *adjacency matrix*  $A$ , whose  $(i,j)$ -th entry  $A_{ij}$  is 1 if nodes  $i$  and  $j$  are

144 adjacent, and 0 otherwise.  $A$  is symmetric and  $n \times n$ , as are all the matrices in this work.

145 Another useful matrix is the *degree* matrix  $D$ , in which  $D_{ij}$  is the degree of node  $i$  if  $i=j$ , and 0

146 otherwise. The *Laplacian* matrix  $L$  is the most complex one we use herein, but is easily

147 calculated using  $L_{ij} = D_{ij} - A_{ij}$ .

148 The *eigenvalues* of a matrix are solutions to the matrix equation  $M\mathbf{v} = \lambda\mathbf{v}$ , where  $M$  is a

149 matrix and  $\mathbf{v}$  a vector of the appropriate size. Solving for  $\mathbf{v}$  yields  $\lambda$ . These eigenvalues,

150 ordered by their size, form the *spectrum* of a graph, as derived using any of the matrices just

151 described. The *Fiedler value* of a graph is the second-smallest eigenvalue of  $L$ , and the

152 *spectral radius* is the largest eigenvalue of  $A$ .

153 Measures of *Modularity* such as the Newman  $Q$  coefficient capture the strength of division

154 within a network by quantifying the density of edges within and between subgroups. When

155 there is no division within the network as the density of edges is the same between and within

156 subgroups  $Q = 0$ , whereas higher values of  $Q$  indicate stronger divisions (Newman 2006). As

157  $Q$  scales with network size (small networks being generally less modular), relative

158 modularity ( $Q_{rel}$ ) allows for comparison across network sizes by normalizing Q using the

159 maximum possible modularity for the network ( $Q_{max}$ ) (Sah *et al.* 2017).

160



161 **Results**

162

163 *Diversity of network structures*

164 We identified substantial variation in network structure across animal taxa. The static  
165 unweighted animal social networks in our database ranged from nearly completely  
166 unconnected (Spectral radius  $\lambda_1 \sim 1$ , Fiedler value  $\sim 0$ , not included in our predictive models)  
167 to highly connected (Spectral radius  $\lambda_1 \sim 160$ , Fiedler value  $\sim 140$ , Fig. 1). Similarly, the  
168 networks ranged from homogeneous (i.e., not modular,  $Q_{rel} = 0$ , see the Text box for a  
169 definition) to highly modular and subdivided ( $Q_{rel} > 0.8$ ). Our principal component analysis  
170 (PCA) identified key axes of structural variation across empirical networks (Fig. 2). The first  
171 principal component (PC1) distinguished networks that had a large diameter and mean path  
172 length and were highly modular (negative values), from networks with a high mean degree  
173 and transitivity (positive values, Fig. 2, see Table S2). The second principal component (PC2)  
174 separated networks based on network size (number of nodes), maximum degree and the  
175 network duration (i.e., the time period over which the network data was collected, Fig. 2).  
176 The eusocial ant networks (*Camponotus fellah*, Insecta: Hymenoptera) and mammal  
177 networks tended to cluster separately (Fig. 1), with the other taxonomic classes dispersed  
178 between these groups (Fig. 1) or species (see Fig. S1 for clustering by species). The  
179 networks' spectral properties (the Fiedler value and spectral radius) explained a unique  
180 portion of structural variance that did not covary with other variables (see Table S1 for vector  
181 loadings and Fig S2 for all pair-wise correlations). We found variables such as mean degree  
182 and transitivity the most correlated with the other variables and were excluded from further  
183 analysis (Tables S2, Fig S2).

184

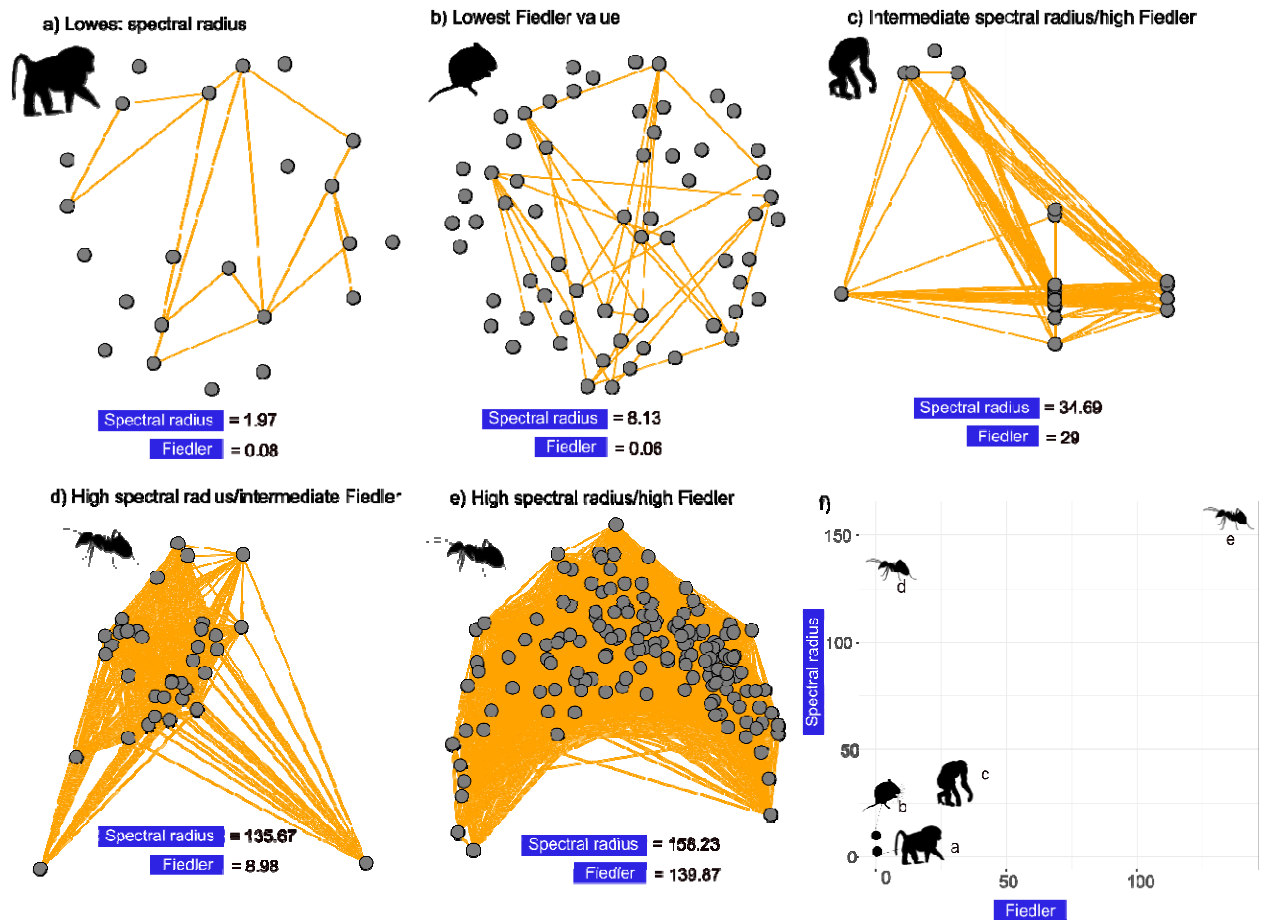

185  
186  
187  
188  
189  
190  
191  
192  
193  
194  
195

**Fig.1:** Examples of networks analysed in this study with a) the lowest spectral radius (baboons *Papio cynocephalus* contact network), b) the lowest Fiedler value (volets *Microtus agrestis* trap sharing network), c) intermediate spectral radius values but high Fiedler value (Chimpanzee *Pan troglodytes* contact network), d) high spectral radius/intermediate Fiedler value (*Camponotus fellah* colony contact network) and e) high values of both measures (another *C. fellah* colony contact network). The mean values across all networks were 34.80 and 7.31 for the spectral radius and Fiedler value respectively. f) summary of values across networks (a-e). Silhouettes were sourced from phylopic (<http://phylopic.org/>). Note that disconnected nodes were not included in the analysis.

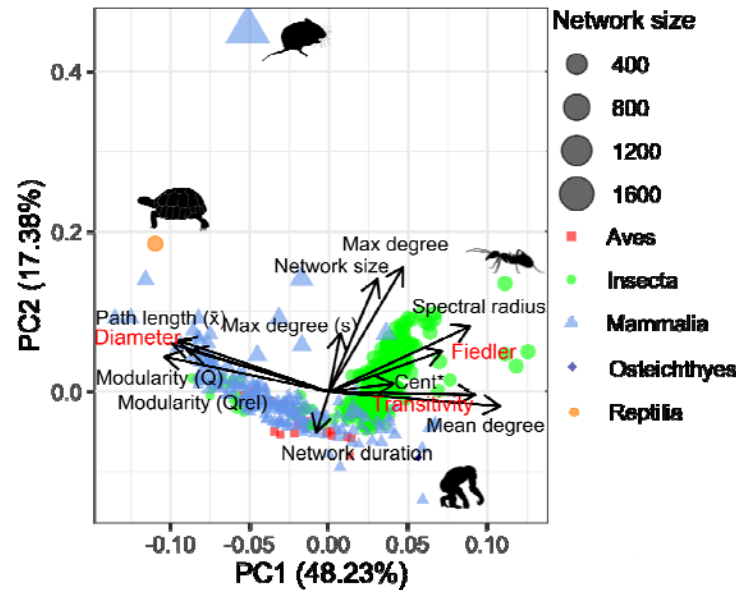

196

197 **Fig. 2:** Principal components analysis (PCA) biplot showing that network structure largely  
198 clusters by taxonomic class. Points are coloured by taxa. Points closer together in Euclidean  
199 space have networks more similar in structure. Points are scaled by network size. The length  
200 and direction of vectors (black arrows) shows how each variable relates to each principal  
201 component with larger vectors having higher loadings on that axis. The PCA was constructed  
202 just using continuous network characteristics. Percentages next to PC scores indicate how  
203 much variability in the data is accounted for by each axis. Cent\*: Centralization. See Table  
204 S1 for axis loadings and Fig. S1 for the species-level clustering. See Tables S2 & S3 for  
205 variable definitions. Silhouettes for some of the outlying networks were sourced from  
206 phylopic (<http://phylopic.org/>). s = scaled. Cent = Centralization.

207

208 *Spectral properties predict pathogen spread across epidemic scenarios*

209

210 We found that network characteristics alone could predict pathogen transmission dynamics

211 remarkably well (Figs. 3 & Fig S3). We constructed models in *MrIML* to predict the

212 maximum proportion of nodes infected in the network over 100 time steps (hereafter

213 ‘proportion infected’). With these models we could predict the proportion infected in a

214 network using both spectral measures and species identity alone (Fig. 3a). Network size,

215 relative modularity and centralization, for example, were less important in predicting

216 proportion infected across all SIR model parameter combinations tested (Fig. 2a). Nonlinear

217 relationships were likely important for prediction of proportion infected, as random forests

218 (RF) had the highest predictive performance overall (Table S4) and substantially  
219 outperformed linear regression in the *MrIML* framework (root mean square error (RMSE)  
220 0.13 vs 0.03). Variable importance and predictor conditional effects were consistent between  
221 the machine learning algorithms, so we subsequently analysed the best performing RF model.  
222 Across all SIR parameter combinations, we found a nonlinear relationship between  
223 proportion infected and spectral radius, with the average prediction of proportion infected  
224 increasing by ~30% across the range of spectral radius values (holding all other variables  
225 constant in the model, Fig. 3b). In contrast we found a more modest effect of the Fiedler  
226 value, with the proportion of infected only increasing on average ~3% across the observed  
227 range of values for all SIR parameters (Fig 3c). We did find a sharp increase in the proportion  
228 infected in networks when the Fiedler value was less than about 15 (Fig. 3c). However, there  
229 was variation in the relationship between the proportion infected and these spectral values  
230 across transmission ( $\beta$ ) and recovery probabilities ( $\gamma$ , Figs. 3d-e). For example, when the  
231 probability of transmission was relatively high ( $\beta = 0.2$ ) and recovery low ( $\gamma = 0.04$ ) the  
232 proportion infected across networks was ~80% and spectral radius had a relatively minor  
233 effect (Fig. 3d). A network's spectral radius had a stronger effect when the probability of  
234 recovery was higher ( $\gamma = 0.4$ ) across all values of  $\beta$ . The increase in proportion infected when  
235 the Fiedler value was low ( $< 15$ ) was not apparent when spread was slower and chances of  
236 recovery higher (e.g.,  $\beta = 0.025$  or  $0.01$ ,  $\gamma = 0.4$ ; Fig 3e). The spectral radius and Fiedler  
237 value patterns overall were similar, with larger values reducing the time-to-peak prevalence  
238 (hereafter 'time to peak', Fig. S3). However, modularity played a greater role in our time to  
239 peak models, with the time to peak being longer for more modular networks above a  $Q_{rel}$   
240 threshold of ~ 0.75 (Fig. S4).

241

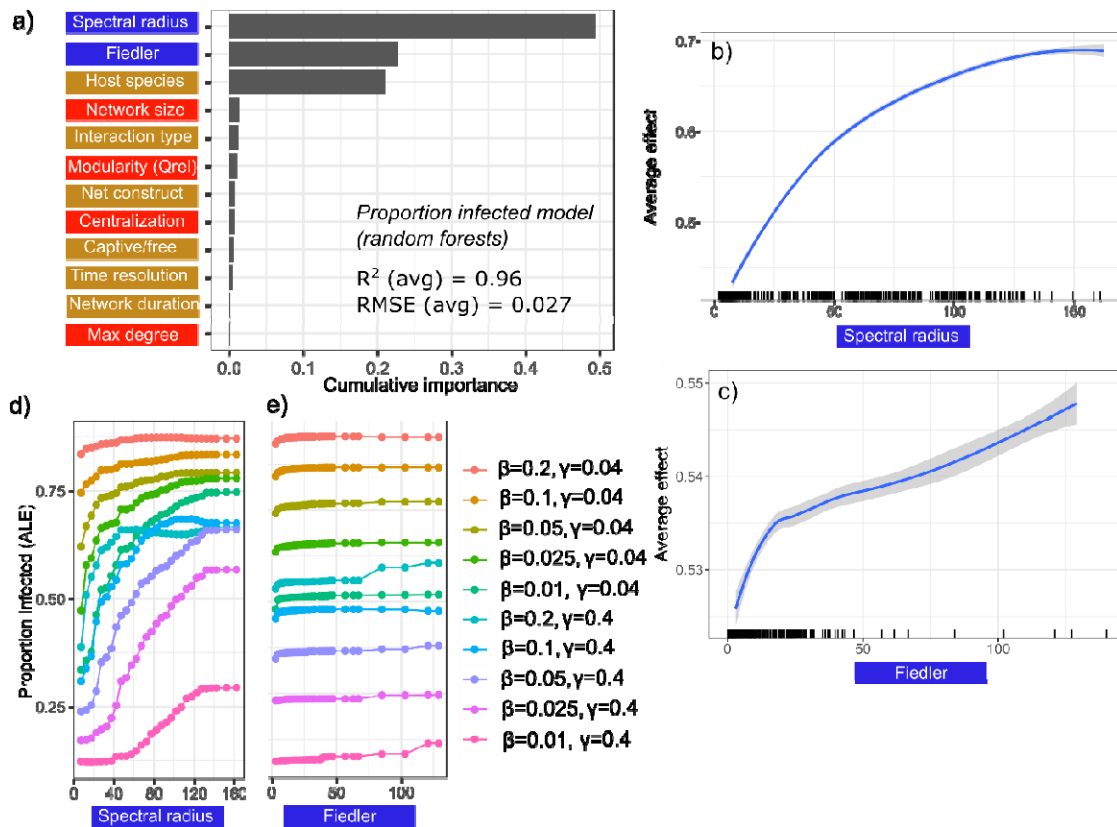

242  
 243 **Fig. 3:** Plots showing the predictive performance, variable importance and the functional  
 244 form of relationships for our best-performing *MrIML* proportion infected model. See Table  
 245 S4 for model performance estimates across algorithms. The colour of the labels indicates  
 246 what type of predictor it is (blue = spectral, red = non-spectral network structural variables,  
 247 gold = network metadata, see Tables S2 & S3). a) Spectral radius and the Fiedler value  
 248 (followed by species) are the most important predictors of proportion of individuals infected  
 249 across all simulations (importance threshold  $>0.1$ ) and overall model performance was high  
 250 (average  $R^2 = 0.96$  and root mean square error (RMSE) = 0.027). b-c) Average predictive  
 251 surface showing the relationship between spectral properties and proportion infected across  
 252 all epidemic values (95% confidence intervals in grey). Rug plot on the x axis of the panels  
 253 on the right shows the distribution of each characteristic across empirical networks. d-e) The  
 254 accumulated local effects (ALE) plot revealed that the strongly non-linear relationships  
 255 between both spectral properties and proportion infected were mediated by transmission and  
 256 recovery probabilities. We chose these SIR parameter values ( $\beta$  = transmission probability,  $\gamma$   
 257 = recovery probability) to ensure major outbreaks occurred on the empirical networks. Net  
 258 construct = Network construction method.

259

260 *Simplifying our models with global surrogates*

261

262 When we further interrogated our moderate ( $\beta = 0.05$ ) transmission models, we found that the  
263 spectral radius and Fiedler value overall also played a dominant role in our predictions of  
264 spread. To quantify the putative mechanisms that underlie our model predictions – ‘to  
265 decloak the black box’ – and gain insight into possible interactions between predictors, we  
266 constructed surrogate decision trees as a proxy for our more complex RF model. We trained  
267 our surrogate decision tree on the predictions of the RF model rather than the network  
268 observations directly. In each case, the surrogate decision tree approximated the predictions  
269 of our models (thousands of decision trees) remarkably well (Global  $R^2 > 0.95$ , see (Molnar  
270 2018) for details). The spectral radius and, to a lesser extent, the Fiedler value and modularity  
271 values dominated surrogate trees for all SIR parameter sets (Fig. 5, Figs. S5 & S6). For  
272 example, for networks with a Fiedler value  $\geq 0.86$  and a spectral radius  $\geq 20$  (as was the case  
273 for 51% of our networks, Fig. 4b) the estimated maximum proportion of the network infected  
274 was 0.92 (Fig. 4b). The duration over which the data was collected also was included in the  
275 surrogate model, with networks collected over  $> 6.5$  days having higher estimates of  
276 proportion infected (Fig. 4b).

277

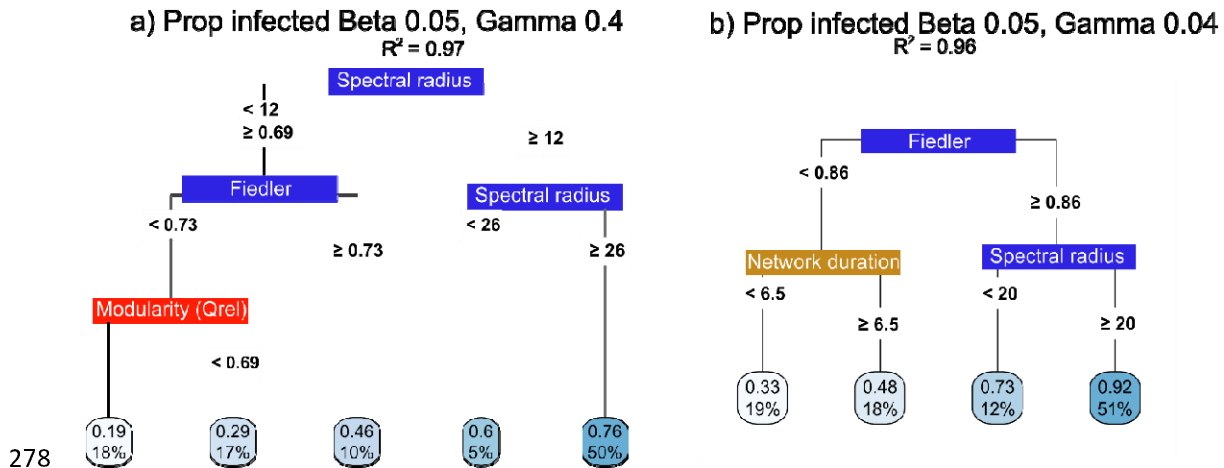

279 **Fig. 4** Global surrogate decision trees for our moderate transmission ( $\beta = 0.05$ ) proportion  
 280 infected with a) high and b) low recovery probability ( $\gamma = 0.4$  and  $0.04$  respectively).  
 281 Threshold values of each variable are included in each tree. The boxes at the tips of the trees  
 282 indicate the estimates of average peak time or proportion of the network infected across  
 283 simulations (top value) and percentage of networks in our dataset to be assigned to this tip.  
 284 For example, 50% of our empirical networks had spectral radius values  $\geq 26$  and for these  
 285 networks we found on average, a maximum of 0.76 of the network infected after 100 time  
 286 steps. Tip boxes are coloured light to dark blue based on network vulnerability to pathogen  
 287 spread (e.g., longer time to peak = light blue). Global fit =  $R^2$  for how well the surrogate  
 288 model replicates the predictions of the trained model. See Figs. S5 for the complete list of  
 289 global surrogate models and Fig. S6 for ‘time to peak’ surrogates. Colour of the label  
 290 indicates what type of predictor it is (blue = spectral, red = non-spectral structural variables,  
 291 gold = network metadata, see Tables S2 & S3).

292

293 *Do our structural estimates generalize to more complex spread scenarios?*

294 To further validate our predictions, we examined how our models predicted *M. bovis* spread  
 295 across badger networks with empirical estimates using Shapley values (Shapley, 1951).

296 Shapley values are a game-theoretic approach to explore the relative contribution of each

297 predictor on individual networks (see *Methods*). While *M. bovis* in badgers often has a

298 prolonged latent period and individuals do not typically recover, generally *M. bovis* is a slow-

299 spreading infection, with an  $R_0$  of between 1.1 and 1.3 (Delahay *et al.* 2013). Thus, we

300 interrogated our most similar model ( $\beta = 0.05$ ,  $\gamma = 0.04$ ,  $R_0 = 1.25$ ). Our model predicted the

301 proportion of infected badgers in the network to be 0.45, which was much lower than the

302 average proportion infected across all networks included in our study (0.71, Fig. 5a). This  
303 difference was largely driven by the badger network's low Fiedler value (0.096, much lower  
304 than the mean of 7.31 across all networks) and, to a lesser degree, by the small spectral radius  
305 (8.10 compared to a mean of 34.8 across all networks, Fig. 5a). This is comparable to  
306 contemporaneous estimates of *M. bovis* prevalence in this population, e.g., 41% of badgers  
307 tested in the network study tested positive (Weber *et al.* 2013).

308

309 We further validated our approach using two Tasmanian devil contact networks (calibrated to  
310 reflect potential DFTD transmission) not included in our training data (Fig. 5) and compared  
311 to model estimate of spread to empirical observations in similar populations. Based on our  
312 model that most closely mirrored devil facial tumour disease DFTD dynamics ( $\beta = 0.2$ ,  $\gamma =$   
313  $0.04$ ,  $R_0 = 5$ , see Hamede *et al.* (2012)) we estimated the proportion infected to be 0.85-0.88  
314 for mating and non-mating seasons respectively. Inputting the devil networks' Fiedler value  
315 and spectral radius into the corresponding global surrogate model provides an estimate of  
316 0.89 of individuals in the network infected (Fig. 5b). The spectral values were the most  
317 important predictors in this model (Fig. 5c). Even though our simulations were not  
318 formulated to model DFTD (e.g., devils rarely recover from DFTD), our machine-learning  
319 estimates closely predicted the empirical findings for this disease. In comparable populations  
320 across the island where the disease was monitored before the onset of the disease, maximum  
321 prevalence estimates ranged from 0.7-1.0 in for sexually matured devils ( $\geq 2$  y.o.) ~100  
322 weeks after disease arrival (McCallum *et al.* 2009). Our predictions of proportion infected  
323 were not particularly sensitive to transmissibility estimates as in our model. For example,  
324 with a 50% reduction in the probability of transmission ( $\beta = 0.1$ ) our estimate of proportion  
325 infected was still similar to empirical estimates (0.83, Fig. S5a). Taken together, our findings



326 show how the spectral values of contact networks offer a valuable and informative

327 “shorthand” for how vulnerable different animal networks are to outbreaks.

328

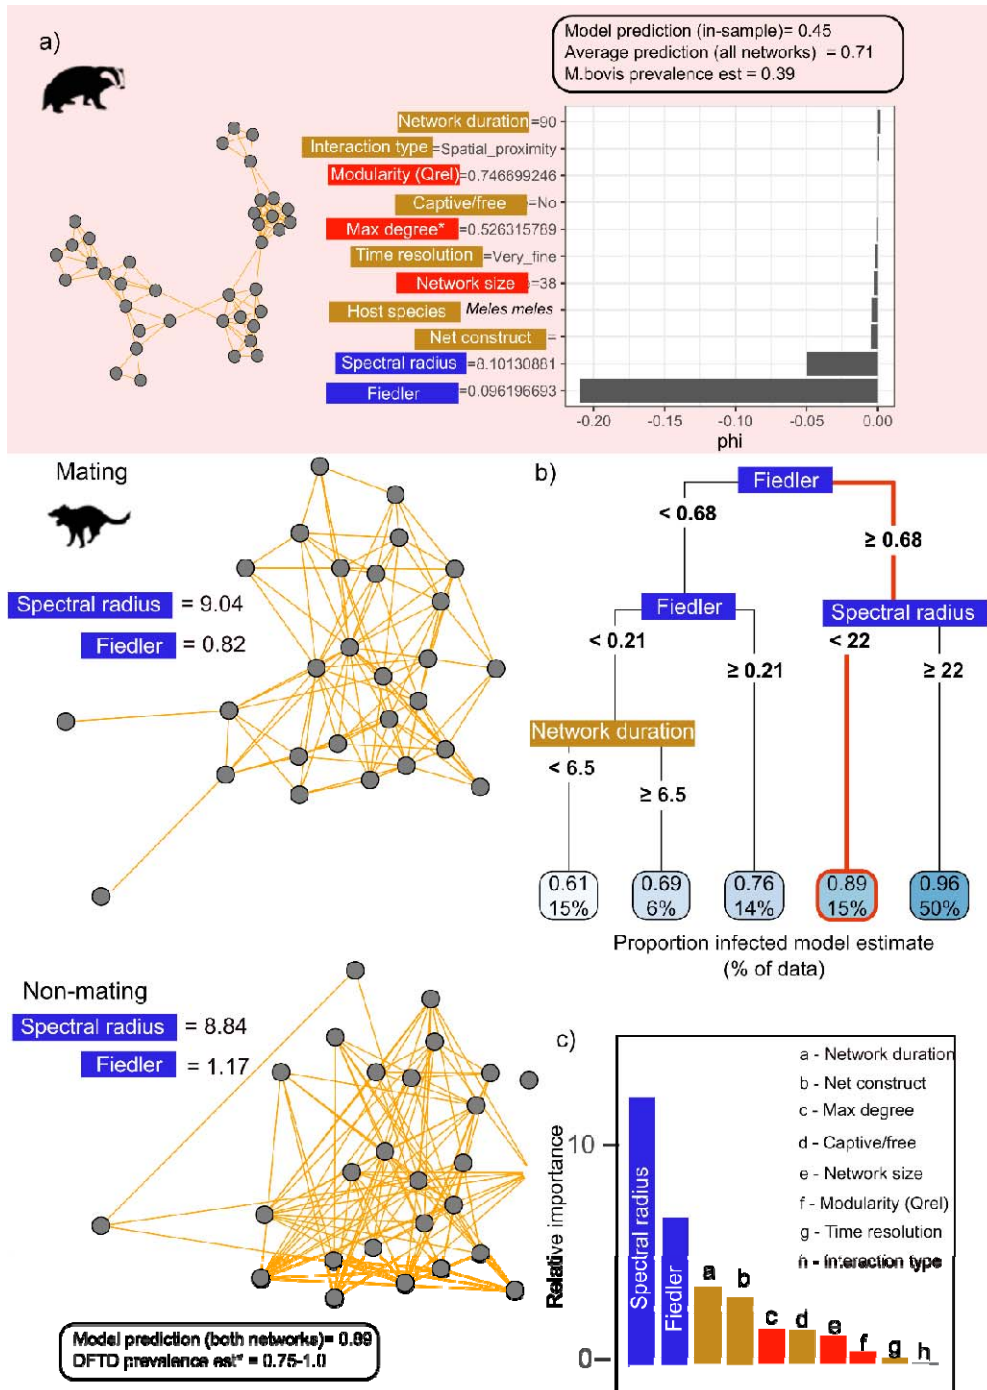

329

330 **Fig. 5:** The spectral radius and the Fiedler underpinned our in-sample prediction of the  
 331 proportion infected estimates in our a) badger and b/c) out-of-sample Tasmanian devil  
 332 contact networks. a) Shapley values ( $\phi$ ) that quantify how each variable shaped simulated  
 333 proportion infected ( $\beta = 0.05$ ,  $\gamma = 0.04$ ) in an empirical badger network. Negative Shapley  
 334 values indicate that the variable reduced the proportion infection relative to other variables  
 335 included in the model. See Fig S7 for other Shapley value analyses of other contrasting  
 336 networks. b) Surrogate decision tree for the model that best approximated Tasmanian devil  
 337 facial tumour disease (DFTD,  $\beta = 0.2$ ,  $\gamma = 0.04$ ). Red lines indicate the branches of the tree

338 corresponding to the spectral values from the left panels. The red outlined box is the  
339 estimated proportion infected for both networks. c) Corresponding variable importance plot  
340 showing the spectral radius and Fiedler value followed by data duration were the most  
341 important predictors in the model. Colour of the labels indicates what type of predictor it is  
342 (blue = spectral, red = non-spectral structural variables, gold = network metadata, see Tables  
343 S2/S3). Panels on the left are the corresponding networks. Net construct = Network  
344 construction method. \*: for sexually mature individuals in comparable populations over  
345 similar time scales to the simulations (McCallum *et al.* 2009).

346

## 347 **Discussion**

348

349 Here, we show that the spectral radius and Fiedler value of a network can be a remarkably  
350 strong predictor for population vulnerability to diverse epidemics varying in key  
351 epidemiological parameters. We demonstrate how a powerful machine learning and  
352 simulation approach can effectively predict pathogen outbreak dynamics on a large collection  
353 of empirical animal contact networks. We not only demonstrate the high predictive power of  
354 a network's spectral properties but also show that our predictions can be a useful tool for  
355 estimating spread in systems with complex disease dynamics. Our findings offer insights into  
356 how nuances in social organisation translate into differences in pathogen spread across the  
357 animal kingdom. Furthermore, our global surrogate models provide animal health  
358 practitioners with an intuitive framework to gain rapid insights into the vulnerability of  
359 populations to the spread of emerging infectious diseases.

360

361 Across real-world contact networks, we found that the networks' spectral properties (Fiedler  
362 distance and spectral radius) were powerful proxies for pathogen spread. The strong  
363 relationship between spectral radius and epidemic threshold has been demonstrated for  
364 theoretical networks (Prakash *et al.* 2010) and has been used to assess vulnerability of cattle  
365 movement networks to spread of bovine brucellosis (Darbon *et al.* 2018). We expand these  
366 findings to show that the spectral radius is the most important predictor in our models of  
367 epidemic behaviour across diverse animal social systems. While we examined only SIR

368 propagation through our networks, theoretical results suggest that our findings will extend to  
369 other propagation mechanics such as SIS, (susceptible-infected-susceptible) and SEIR  
370 (susceptible, exposed, infected, recovered) (Prakash *et al.* 2010). Given that both the badger  
371 *M. bovis* and DFTD systems have more complex propagation mechanics compared to SIR,  
372 our models could still predict disease dynamics of both disease systems reasonably well. We  
373 that note that for DFTD, disease simulation models that assume homogeneous mixing of  
374 hosts provide similar estimates of disease dynamics to network-based simulations (Hamede *et*  
375 *al.* 2012). However, Hamede *et al.* (2012) found the outcome of simulated DFTD epidemics  
376 sensitive to estimates of latent period and transmissibility parameters, whereas our network  
377 structure approach provided realistic estimates of prevalence with minimal reliance on  
378 parameter values.

379

380 For some networks and epidemiological parameters, spectral radius alone was not sufficient  
381 to predict spread, and the Fiedler value and modularity still played an important role. The  
382 Fiedler value and spectral radius of the networks were correlated, but below our  $\rho = 0.7$   
383 threshold (Fig. S2). One potential reason for this is that the Fiedler value seems to be less  
384 sensitive to nodes with high connectivity compared to the spectral radius (Fig. 1); however,  
385 the mathematical relationship between these two algebraic measures of connectivity is poorly  
386 understood (Tang & Priebe 2016). Combined, our global surrogate models and accumulated  
387 effects plots pointed to networks such as the devil networks with spectral radii  $> \sim 8$  and  
388 Fiedler values  $> 1$  being more vulnerable to pathogen spread (the effect of the Fiedler value  
389 on spread was much weaker overall). The spectral properties were dominant for the fast-  
390 spreading pathogen models (e.g., example system), whereas network size and modularity  
391 played a more important role in our models for more slowly spreading pathogens (e.g., Figs.  
392 S5 & S6).

393

394 When modular structure played a role in disease spread in our study, we detected similar  
395 patterns to those found by Sah *et al.* (2017). As in Sah *et al.* (2017), we found that epidemic  
396 progression was only slowed in highly modular networks ( $Q_{rel} > \sim 0.7$ ) when the probability  
397 of transmission between nodes was low ( $\beta > 0.025$ ). Such subdivided networks were rare in  
398 our data and are commonly associated with high fragmentation (small groups or sub-groups)  
399 and high subgroup cohesion (Sah *et al.* 2017). The reduced importance of modularity relative  
400 to spectral radius is due to within-group connections being crucial for epidemic outcomes in  
401 many contexts (Sah *et al.* 2017). Spectral values may have higher predictive performance, as  
402 they summarize connectivity across the networks including between- and within-group  
403 connections. Interpreting how modularity alone impacted epidemic outcomes was difficult on  
404 these empirical networks, as all modularity measures were strongly correlated with mean  
405 degree, diameter and transitivity (Fig. 2, Fig. S2). The extent of these correlations can vary  
406 wildly based on other aspects of network structure and they all have interacting effects on  
407 disease dynamics (Zhang & Zhang 2009; Ames *et al.* 2011). However, the spectral radius  
408 captures epidemiologically important aspects of network structure on its own without having  
409 to untangle whether different aspects of network structure are correlated.

410

411 More broadly, our study provides a framework for how interpretable machine learning can  
412 predict spread across networks for a wide variety of epidemic parameters. While our RF  
413 *MrIML* model had much higher predictive performance compared to the corresponding linear  
414 models, further investigation of these models provided critical insight into how network  
415 structure impacted pathogen spread. This framework could identify general trends of disease  
416 vulnerability, specific thresholds for pathogens with certain characteristics, as well as the  
417 drivers of spread for individual networks.

418

419 To help practitioners apply our model to different host-pathogen systems, we developed an  
420 R-Shiny app (<https://spreadpredictr.shinyapps.io/spreadpredictr/>). Our web app allows users  
421 to make predictions of spread for diverse transmission and recovery probabilities on a contact  
422 network of interest without the need for simulation. Even when the underlying mechanism of  
423 spread was mis-specified, as with our case studies, our model could provide reasonable  
424 estimates of the proportion of the population infected that align closely with empirical data.  
425 While currently limited to pathogens with SIR transmission dynamics, future versions of the  
426 app will include, for example, SI and SEIR mechanics. We stress that for practitioners to  
427 make accurate predictions for a particular pathogen, contact definitions and the duration of  
428 data should be calibrated or multiple thresholds for what constitutes a transmission contact  
429 assessed (see Craft 2015). For example, for the giraffe network we included edges that  
430 represented individuals seen once together over a period of a year, and predictions of  
431 pathogen spread on this network would likely be inflated for pathogens requiring more  
432 sustained contact (VanderWaal *et al.* 2014). Nonetheless, this study shows the utility of  
433 linking network simulation and interpretable machine learning approaches to tease apart the  
434 drivers of spread across empirical wildlife networks

435

436 As this is a broad, comparative study of simulated pathogen spread on 603 empirical  
437 networks across taxonomic groups, we made important simplifying assumptions. For  
438 example, as there were large differences in how the empirical network edges were weighted  
439 across taxa (e.g., some networks were weighted by contact duration and others by contact  
440 frequency) our approach treated all contacts as equal in unweighted networks, as is done in  
441 similar studies (Ames *et al.* 2011; Sah *et al.* 2017). We also simulated spread across static  
442 networks, making the assumptions (i) that aggregated networks are representative or social

443 patterns at epidemiologically-relevant timescales and (ii) that network change happens more  
444 slowly than pathogen spread. Including predictions of spread that account for the dynamic  
445 nature of contact structure and pathogen-mediated changes in behaviour is an important  
446 future extension of this work. However, applying dynamic network models such as temporal  
447 exponential random graph models (Krivitsky & Handcock 2014) to estimate spread is  
448 computationally demanding and challenging in a comparative setting due to idiosyncrasies in  
449 the model-fitting process. While of high predictive value, our models did not capture all  
450 aspects of uncertainty. For example, we assumed each network was fully described, with no  
451 missing nodes or edges, which is almost always not the case for wildlife studies. How  
452 sensitive spectral properties are to missing data is an open question. However, promisingly,  
453 removing edges from ecological networks with high Fiedler values does not appear to  
454 strongly impact the stability of the network (Kumar *et al.* 2019).

455

456 Another limitation of this study is that our models did not account for uncertainty in  
457 predictions. Currently, more probabilistic models such as BART (Bayesian Additive  
458 Regression Trees) (Carlson 2020) are not available in the *MrIML* framework, but future  
459 extensions may allow for methods such as BART to be incorporated (Fountain-Jones *et al.*  
460 2021). However, one advantage of our approach is that for the RF model (proportion  
461 infected), host species (and the other categorical variables, see Table S3) could be added as a  
462 categorical predictor rather than hot-encoded set of 43 predictors (one binary predictor for  
463 each species (-1)). This simplified interpretations about how host species affect pathogen  
464 spread differently, while accounting for nonindependence of intra-species networks (e.g.,  
465 networks for host species A from different populations of that species or from different  
466 timepoints) (Sah *et al.* 2019). A large proportion of the networks (~150) came from one taxon  
467 (*C. fellah*); removing this one taxon did not qualitatively change our findings. While this

468 study demonstrates the power of repositories such as the ASNR, there are large biases in the  
469 taxa covered that must be accounted for in model structure. Starting to fill in these taxonomic  
470 gaps in a systematic way will increase the utility of comparative approaches such as ours and  
471 make them generalizable across taxa and populations.

472

473 This paper provides a significant step towards a spectral understanding of pathogen spread in  
474 animal networks. In particular, we show that the spectral radius of an animal network is a  
475 powerful predictor of spread for diverse hosts and pathogens that can be a valuable shortcut  
476 for stakeholders to understand the vulnerability of animal networks to disease. We also  
477 demonstrate how multivariate interpretable machine learning models can provide novel  
478 insights into spread across scales. Moreover, this study identified the key axes of network  
479 structural variation across the animal kingdom that can inform future comparative network  
480 research. As rapid advances in location-based tracking and bio-logging (Katzner & Arlettaz  
481 2020) make network data more readily available to wildlife managers, approaches like this  
482 one will be of increasing value.

483

## 484 **Methods**

### 485 *Networks*

486 We downloaded all animal contact networks from the ASNR on 12<sup>th</sup> January 2022 (Sah *et al.*  
487 2019) and combined these with other comparable published animal contact networks  
488 (Rushmore *et al.* 2013; Weber *et al.* 2013; VanderWaal *et al.* 2014). We binarized each  
489 network, extracted the largest connected component, and excluded networks with fewer than  
490 10 individuals. This left us with 603 networks from 43 species.

491



492 From each network we calculated a variety of network structure variables using the R  
493 package *igraph* (Csárdi & Nepusz 2006) (see Table S2). As these networks were constructed  
494 using a wide variety of techniques, we also extracted metadata from the ASNR or the  
495 publication associated with the network (Table S3). These variables were also added to the  
496 models. We used Principal Components Analysis (PCA) biplots to examine the drivers of  
497 variation in network structure and visualise how networks clustered by taxonomic class. We  
498 removed networks with missing metadata (8 networks) and screened for correlations between  
499 variables. As many of the machine learning variables are less sensitive to collinearity  
500 (Fountain-Jones *et al.* 2019) we used a pairwise correlation threshold of 0.7 and removed  
501 variables from the pair with the highest overall correlation (Table S2).

## 502 *Simulations*

503

504 To simulate the spread of infection on each network we used our R package “EpicR”  
505 ([Epidemics by computers in R](https://github.com/mcharleston/epicr); available on GitHub at <https://github.com/mcharleston/epicr>).

506 The simulations use a standard discretisation of the SIR model, in which time proceeds in  
507 “ticks,” for example representing days. Initially one individual was chosen at uniform random  
508 to be infected (I) and all others were susceptible (S). At each time step, one of two changes of  
509 state can happen to each individual (represented by a node), depending on its current state.  
510 An ‘S’ individual will become infected (I) with a probability  $(1 - (1 - \beta)^k)$ , where  $k$  is the  
511 number of currently infected neighbours it has, or otherwise stay as S; an ‘I’ individual will  
512 recover (R) with probability  $\gamma$  or remain as I. Recovered (R) individuals stay as R.

513 In classical deterministic SIR models as a set of differential equations,  $\beta$  and  $\gamma$  are  
514 instantaneous rates; here, they are probabilities per time step, so at a coarse level, they are  
515 comparable.

516 On each network, we performed 1000 simulations using different combinations of  
517 transmission ( $\beta = 0.01, 0.025, 0.05, 0.1, 0.2$ ) and recovery probabilities ( $\gamma = 0.04, 0.4$ ). We  
518 chose these values to broadly reflect a range of scenarios from high to low transmissibility  
519 and slow to fast recovery (Leung 2021) and ensure large outbreaks (>10% on individuals  
520 infected, see Fig S8 for the analysis with a wider variety of recovery rates) (Sah *et al.* 2017).  
521 For each simulation we recorded two complementary epidemic measures to capture disease  
522 burden and speed of spread: a) the maximum prevalence reached, or the maximum proportion  
523 of individuals infected in the network after 100 time steps and b) time to outbreak peak (i.e.,  
524 which time step had the maximum number of infections). We chose 100 time steps to ensure  
525 that the epidemic ended and there were no remaining infected nodes. One randomly chosen  
526 individual was infected at the beginning of the simulation. The average maximum proportion  
527 infected and time to outbreak across all simulations for each parameter combination were  
528 used as the response variables in the machine learning models,

529

### 530 *Machine learning pipeline*

531

532 We used a recently developed multi-response interpretable machine learning approach (*Mr*  
533 *IML*, Fountain-Jones *et al.* 2020) to predict outbreak characteristics using network structure  
534 variables. Our *MrIML* approach had the advantage of allowing us to rapidly construct and  
535 compare models across a variety of machine-learning algorithms for each of our response  
536 variables as well as assess generalized predictive surfaces across epidemic parameters.

537

538 To test the robustness of our results, we compared the performance of four different  
539 underlying supervised regression algorithms in our *MrIML* models. We compared linear  
540 models (LMs), support vector machines (SVMs), random forests (RF) and gradient boosted

541 models (GBMs) as they operate in markedly different ways that can affect predictive  
542 performance (Fountain-Jones *et al.* 2019; Machado *et al.* 2019). Categorical predictors such  
543 as ‘species’ were hot-encoded for some models as needed (see Table S4). As both types of  
544 responses in our models were continuous, we compared the performance of each algorithm  
545 using the average  $R^2$  and root mean squared error (RMSE) across all responses (hereafter, the  
546 ‘global model’). As we included models that were not fit using sums of squares, our  $R^2$   
547 estimate depended on the squared correlation between the observed and predicted values  
548 (Kvålseth 1985). As ants (Insecta: Formicinae) were over-represented, we compared model  
549 performance and interpretation with and without these networks. To calculate each  
550 performance metric, we used 10-fold cross validation to prevent overfitting each model. We  
551 tuned hyperparameters for each model (where appropriate) using 100 different hyper-  
552 parameter combinations (a 10×10 grid search) and selected the combination with the lowest  
553 RMSE. The underlying algorithm with the highest predictive performance was interrogated  
554 further.

555

556 We interpreted this final model using a variety of model-agnostic techniques within the  
557 *MrIML* framework. We assessed overall and model-specific variable importance using a  
558 variance-based method (Greenwell *et al.* 2018). We quantified how each variables alters  
559 epidemic outcomes using accumulated local effects (ALEs) (Apley & Zhu 2016). In brief,  
560 ALEs isolate the effect of each network characteristic on epidemic outcomes using a sliding  
561 window approach calculating the average change in prediction across the values range (while  
562 holding all other variables constant) (Molnar 2018). ALEs are less sensitive to correlations  
563 and straightforward to interpret as points on the ALE curve are the difference from the mean  
564 prediction (Apley & Zhu 2016; Molnar 2018; Fountain-Jones *et al.* 2021).

565

566 To further examine the predictive performance of our black-box models (SVM, RF and  
567 GBM) we calculated a global surrogate decision tree (hereafter ‘global surrogate’) to  
568 approximate the predictions of our more complex trained models. Global surrogates are  
569 generated by training a simpler decision tree to the *predictions* (instead of observations) of  
570 the more complex ‘black box’ models using the network structure data. How well the  
571 surrogate model performed compared to the complex model is then estimated using  $R^2$ . See  
572 Molnar (2018) for details.

573

574 Lastly, we gained more insight into model behaviour and how network structure impacted  
575 epidemic outcomes on individual networks, including by calculating Shapley values  
576 (Štrumbelj & Kononenko 2014). Shapley values use a game theoretic approach to play off  
577 variables in the model with each other based on their contribution to the prediction (Shapley  
578 1953). For example, negative Shapley values indicate that the observed value ‘contributed to  
579 the prediction’ by reducing the proportion infected or time to peak in an outbreak for a  
580 particular network. See Molnar (2018) for a more detailed description and (Fountain-Jones *et*  
581 *al.* 2019; Worsley-Tonks *et al.* 2020) for how they can be interpreted in epidemiological  
582 settings.

583

584 We validated our results using networks with well-documented disease dynamics. The  
585 European badger network was included in our training data, and we selected the propagation  
586 model with a slow recovery rate ( $\gamma = 0.04$ ) and intermediate transmissibility ( $\beta = 0.05$ ) that  
587 provided an equivalent/similar  $R_0$  (1.1-1.3) to *M. bovis* in the studied badger population  
588 (Delahay *et al.* 2013). It should be noted here that *M. bovis* infection has SEI(R)(D)

589 dynamics, being frequently latent in badgers for long periods with infection only resolving in  
590 some individuals (the most infectious individuals with progressed disease have elevated  
591 mortality (Corner *et al.* 2011)). We compared the proportion infected returned by our model  
592 to various contemporaneous estimates of *M. bovis* prevalence (Delahay *et al.* 2013; Buzdugan  
593 *et al.* 2017) in the long-term study that contact network data were collected in (McDonald *et*  
594 *al.* 2018).

595 The Tasmanian devil networks were not included in the training data. To compare  
596 predictions, we extracted the predict function from the model that was the most similar to  
597 estimates of DFTD dynamics based on empirical data ( $\beta = 0.2$ ,  $\gamma = 0.04$ ,  $R_0 = 5$ ) (McCallum  
598 *et al.* 2009; Hamede *et al.* 2012). DFTD has SEI(D) dynamics in devil populations, however,  
599 accurately estimating the latent period is impossible, as there is (as of May 2022) no  
600 diagnostic tool to detect DFTD prior to visual detection of the tumours (Hamede *et al.* 2012).  
601 As we wanted to make predictions on a species not included in our dataset, we reran the  
602 models excluding the species predictor and the model performance, and results were very  
603 similar. See <https://github.com/nfj1380/igraphEpi> for our complete analytical pipeline.

#### 604 **Acknowledgements**

605 This project was supported by an Australian Research Council Discovery Project Grant  
606 (DP190102020). We would also like to thank Prof. Menna Jones and Prof. Sue VandeWoude  
607 for their support and comments on this manuscript.

608

## 609 **References**

- 610 Ames, G.M., George, D.B., Hampson, C.P., Kanarek, A.R., McBee, C.D., Lockwood, D.R.,  
611 *et al.* (2011). Using network properties to predict disease dynamics on human contact  
612 networks. *Proceedings of the Royal Society B: Biological Sciences*, 278, 3544–3550.
- 613 Apley, D.W. & Zhu, J. (2016). Visualizing the effects of predictor variables in black box  
614 supervised learning models. *Journal of the Royal Statistical Society. Series B: Statistical*  
615 *Methodology*, 82, 1059–1086.
- 616 Bansal, S., Grenfell, B.T. & Meyers, L.A. (2007). When individual behaviour matters:  
617 homogeneous and network models in epidemiology. *J R Soc Interface*, 4, 879–891.
- 618 Bansal, S., Read, J., Pourbohloul, B. & Meyers, L.A. (2010). The dynamic nature of contact  
619 networks in infectious disease epidemiology. *J Biol Dyn*, 4, 478–489.
- 620 Buzdugan, S.N., Vergne, T., Grosbois, V., Delahay, R.J. & Drewe, J.A. (2017). Inference of  
621 the infection status of individuals using longitudinal testing data from cryptic populations:  
622 Towards a probabilistic approach to diagnosis. *Sci Rep*, 7, 1111.
- 623 Carlson, C.J. (2020). embarcadero: Species distribution modelling with Bayesian additive  
624 regression trees in R. *Methods in Ecology and Evolution*, 11, 850–858.
- 625 Corner, L.A.L., Murphy, D. & Gormley, E. (2011). *Mycobacterium bovis* Infection in the  
626 Eurasian Badger (*Meles meles*): the disease, pathogenesis, epidemiology and control. *Journal*  
627 *of Comparative Pathology*, 144, 1–24.
- 628 Craft, M.E. (2015). Infectious disease transmission and contact networks in wildlife and  
629 livestock. *Philosophical transactions of the Royal Society of London. Series B, Biological*  
630 *sciences*, 370, 20140107-.
- 631 Craft, M.E., Volz, E., Packer, C. & Meyers, L.A. (2011). Disease transmission in territorial  
632 populations: the small-world network of Serengeti lions. *Journal of the Royal Society*  
633 *Interface*, 8, 776–786.
- 634 Darbon, A., Valdano, E., Poletto, C., Giovannini, A., Savini, L., Candeloro, L., *et al.* (2018).  
635 Network-based assessment of the vulnerability of Italian regions to bovine brucellosis.  
636 *Preventive Veterinary Medicine*, 158, 25–34.
- 637 Delahay, R.J., Walker, N., Smith, G.S., Wilkinson, D., CLIFTON-HADLEY, R.S.,  
638 Cheeseman, C.L., *et al.* (2013). Long-term temporal trends and estimated transmission rates  
639 for *Mycobacterium bovis* infection in an undisturbed high-density badger (*Meles meles*)  
640 population. *Epidemiology and Infection*, 141, 1445–1456.
- 641 Eames, K., Bansal, S., Frost, S. & Riley, S. (2015). Six challenges in measuring contact  
642 networks for use in modelling. *Epidemics*, 10, 72–77.
- 643 Fountain-Jones, N., Kozakiewicz, C., Forester, B., Landguth, E., Carver, S., Charleston, M.,  
644 *et al.* (2021). MrIML: Multi-response interpretable machine learning to map genomic  
645 landscapes. *Molecular Ecology Resources*, 21, 2766–2781.

- 646 Fountain-Jones, N.M., Machado, G., Carver, S., Packer, C., Recamonde-Mendoza, M. &  
647 Craft, M.E. (2019). How to make more from exposure data? An integrated machine learning  
648 pipeline to predict pathogen exposure. *Journal of Animal Ecology*, 88.
- 649 Greenwell, B.M., Boehmke, B.C. & McCarthy, A.J. (2018). A simple and effective model-  
650 based variable importance measure. *arXiv Preprint arXiv:1805.04755*.
- 651 Hamede, R., Bashford, J., Jones, M. & McCallum, H. (2012). Simulating devil facial tumour  
652 disease outbreaks across empirically derived contact networks. *Journal of Applied Ecology*,  
653 49, 447–456.
- 654 Hamede, R.K., Bashford, J., McCallum, H. & Jones, M. (2009). Contact networks in a wild  
655 Tasmanian devil (*Sarcophilus harrisii*) population: using social network analysis to reveal  
656 seasonal variability in social behaviour and its implications for transmission of devil facial  
657 tumour disease. *Ecology Letters*, 12, 1147–1157.
- 658 Katzner, T.E. & Arlettaz, R. (2020). Evaluating contributions of recent tracking-based animal  
659 movement ecology to conservation management. *Frontiers in Ecology and Evolution*, 7.
- 660 Krivitsky, P.N. & Handcock, M.S. (2014). A Separable Model for Dynamic Networks. *J R*  
661 *Stat Soc Series B Stat Methodol*, 76, 29–46.
- 662 Kumar, D., Gupta, J. & Raha, S. (2019). Partitioning a reaction–diffusion ecological network  
663 for dynamic stability. *Proc Math Phys Eng Sci*, 475, 20180524.
- 664 Kvålseth, T.O. (1985). Cautionary Note about R 2. *The American Statistician*, 39, 279–285.
- 665 Lentz, H.H.K., Selhorst, T. & Sokolov, I.M. (2012). Spread of infectious diseases in directed  
666 and modular metapopulation networks. *Phys Rev E Stat Nonlin Soft Matter Phys*, 85, 066111.
- 667 Machado, G., Vilalta, C., Recamonde-Mendoza, M., Corzo, C., Torremorell, M., Perez, A., *et*  
668 *al.* (2019). Identifying outbreaks of Porcine Epidemic Diarrhea virus through animal  
669 movements and spatial neighborhoods. *Scientific Reports*, 9, 457.
- 670 McCabe, C.M. & Nunn, C.L. (2018). Effective network size predicted from simulations of  
671 pathogen outbreaks through social networks provides a novel measure of structure-  
672 standardized group size. *Frontiers in Veterinary Science*, 5.
- 673 McCallum, H., Jones, M., Hawkins, C., Hamede, R., Lachish, S., Sinn, D.L., *et al.* (2009).  
674 Transmission dynamics of Tasmanian devil facial tumor disease may lead to disease-induced  
675 extinction. *Ecology*, 90, 3379–3392.
- 676 McDonald, J.L., Robertson, A. & Silk, M.J. (2018). Wildlife disease ecology from the  
677 individual to the population: Insights from a long-term study of a naturally infected European  
678 badger population. *Journal of Animal Ecology*, 87, 101–112.
- 679 Meyers, L.A., Newman, M.E.J. & Pourbohloul, B. (2006). Predicting epidemics on directed  
680 contact networks. *J Theor Biol*, 240, 400–418.
- 681 Meyers, L.A., Pourbohloul, B., Newman, M.E.J., Skowronski, D.M. & Brunham, R.C.  
682 (2005). Network theory and SARS: predicting outbreak diversity. *J Theor Biol*, 232, 71–81.



- 683 Molnar, C. (2018). *Interpretable machine learning*. Retrieved from  
684 <https://christophm.github.io/interpretable-ml-book/>.
- 685 Newman, M.E.J. (2002). The spread of epidemic disease on networks. *Physical Review E*, 66.  
686 Newman, M.E.J. (2006). Community structure in social and biological networks.  
687 *Proceedings of the National Academy of Sciences of the United States of America*, 99, 7821–  
688 6.
- 689 Porter, M.A. (2020). Nonlinearity + Networks: A 2020 Vision. *Emerging Frontiers in*  
690 *Nonlinear Science*, 32, 131–159.
- 691 Prakash, B.A., Chakrabarti, D., Faloutsos, M., Valler, N. & Faloutsos, C. (2010). Got the Flu  
692 (or Mumps)? Check the Eigenvalue! *arXiv:1004.0060 [cond-mat, physics:physics, q-bio]*.
- 693 Rushmore, J., Caillaud, D., Matamba, L., Stumpf, R.M., Borgatti, S.P. & Altizer, S. (2013).  
694 Social network analysis of wild chimpanzees provides insights for predicting infectious  
695 disease risk. *Journal of Animal Ecology*, 82, 976–986.
- 696 Sah, P., Leu, S.T., Cross, P.C., Hudson, P.J. & Bansal, S. (2017). Unraveling the disease  
697 consequences and mechanisms of modular structure in animal social networks. *PNAS*, 114,  
698 4165–4170.
- 699 Sah, P., Mann, J. & Bansal, S. (2018). Disease implications of animal social network  
700 structure: A synthesis across social systems. *Journal of Animal Ecology*, 87, 546–558.
- 701 Sah, P., Méndez, J.D. & Bansal, S. (2019). A multi-species repository of social networks. *Sci*  
702 *Data*, 6, 44.
- 703 Sah, P., Otterstatter, M., Leu, S.T., Leviyang, S. & Bansal, S. (2021). Revealing mechanisms  
704 of infectious disease spread through empirical contact networks. *PLOS Computational*  
705 *Biology*, 17, e1009604.
- 706 Salathé, M. & Jones, J.H. (2010). Dynamics and Control of Diseases in Networks with  
707 Community Structure. *PLOS Computational Biology*, 6, e1000736.
- 708 Shapley, L.S. (1953). Stochastic games. *Proceedings of the National Academy of Sciences of*  
709 *the United States of America*, 39, 1095–1100.
- 710 Shu, P., Wang, W., Tang, M., Zhao, P. & Zhang, Y.-C. (2016). Recovery rate affects the  
711 effective epidemic threshold with synchronous updating. *Chaos*, 26, 063108.
- 712 Silk, M.J., Croft, D.P., Delahay, R.J., Hodgson, D.J., Boots, M., Weber, N., *et al.* (2017).  
713 Using Social Network Measures in Wildlife Disease Ecology, Epidemiology, and  
714 Management. *Bioscience*, 67, 245–257.
- 715 Štrumbelj, E. & Kononenko, I. (2014). Explaining prediction models and individual  
716 predictions with feature contributions. *Knowledge and Information Systems*, 41, 647–665.
- 717 Tang, M. & Priebe, C.E. (2016). Limit theorems for eigenvectors of the normalized Laplacian  
718 for random graphs. *arXiv:1607.08601 [stat]*.



- 719 VanderWaal, K.L., Atwill, E.R., Isbell, L.A. & McCowan, B. (2014). Linking social and  
720 pathogen transmission networks using microbial genetics in giraffe (*Giraffa camelopardalis*).  
721 *The Journal of Animal Ecology*, 83, 406–14.
- 722 Weber, N., Carter, S.P., Dall, S.R.X., Delahay, R.J., McDonald, J.L., Bearhop, S., *et al.*  
723 (2013). Badger social networks correlate with tuberculosis infection. *Current Biology*, 23,  
724 R915–R916.
- 725 White, L.A., Forester, J.D. & Craft, M.E. (2017). Using contact networks to explore  
726 mechanisms of parasite transmission in wildlife. *Biological Reviews*, 92, 389–409.
- 727 Worsley-Tonks, K.E.L., Escobar, L.E., Biek, R., Castaneda-Guzman, M., Craft, M.E.,  
728 Streicker, D.G., *et al.* (2020). Using host traits to predict reservoir host species of rabies  
729 virus. *PLOS Neglected Tropical Diseases*, 14, e0008940.
- 730 Zhang, Z. & Zhang, J. (2009). A big world inside small-world networks. *PLoS One*, 4, e5686.  
731
